# Supplementary material
Source: publisher figshare collection journal article supplement (https://sage.figshare.com/ndownloader/files/13612325)
Supplement: Supplementary file 1 [file 13612325]

**Supplementary Table 1S** Anatomic Therapeutical Chemical (ATC) and International Classification of Disease version 10 (ICD-10) codes used to identify comorbidity in the time period 1995-1998

|                                                                      | <b>ATC codes</b>                                                                | <b>ICD10 codes</b>                                                                                                                                                                                              |
|----------------------------------------------------------------------|---------------------------------------------------------------------------------|-----------------------------------------------------------------------------------------------------------------------------------------------------------------------------------------------------------------|
| <b>Acute myocardial infarction</b>                                   |                                                                                 | I21-I22; I23-I24                                                                                                                                                                                                |
| <b>Cancer</b>                                                        |                                                                                 | C00-C14; C30-C33; C37-C42; C45-C49; C69; C73-74; C754-C759; C15-C17; C22-C26; C18; C19-C21; C34; C43; C44; C50; C51-C52; C56-C58; C53; C55; C60; C62-C63; C61; C64-C68; C76-C80; C97; C81-C96                   |
| <b>Cerebrovascular diseases</b>                                      |                                                                                 | I62; I65-I68                                                                                                                                                                                                    |
| <b>Chronic ischemic heart disease</b>                                |                                                                                 | I25                                                                                                                                                                                                             |
| <b>Chronic obstructive pulmonary disorder</b>                        | R03AC18; R03AC19; R03AL02; R03AL03; R03AL04; R03BB04; R03BB05; R03BB06; R03DX07 | J44 <sup>2</sup> ; J96 <sup>2</sup> combined with J44 <sup>3</sup> ; J13-J18 <sup>2</sup> combined with J44 <sup>3</sup> or J96 <sup>3</sup> .                                                                  |
| <b>Dementia</b>                                                      | N06D                                                                            | F00; G30; F01; F02.0; F03.9; G31.8B; G31.8E; G31.9; G31.0B                                                                                                                                                      |
| <b>Depression</b>                                                    | N06A                                                                            | F32, F33, F34.1, F06.32                                                                                                                                                                                         |
| <b>Diabetes mellitus</b>                                             | A10A <sup>1</sup> , A10B <sup>1</sup>                                           | E10; E11 <sup>1</sup> ; E12-14                                                                                                                                                                                  |
| <b>Heart failure</b>                                                 |                                                                                 | I11.0 <sup>2</sup> ; I13.0 <sup>2</sup> ; I13.2 <sup>2</sup> ; I42.0 <sup>2</sup> ; I42.6 <sup>2</sup> ; I42.7 <sup>2</sup> ; I42.9 <sup>2</sup> ; I50.0 <sup>2</sup> ; I50.1 <sup>2</sup> ; I50.9 <sup>2</sup> |
| <b>Osteoporosis</b>                                                  | M05BA01; M05BA04; M05BA06; M05BA07; M05BB01; M05BB03; G03XC01; H05AA02; H05AA03 | M80-M81                                                                                                                                                                                                         |
| <b>Parkinson</b>                                                     | N04                                                                             | G20, G21, G22, F02.3                                                                                                                                                                                            |
| <b>Pulmonary heart disease and diseases of pulmonary circulation</b> |                                                                                 | I26-I28                                                                                                                                                                                                         |
| <b>Rheumatoid arthritis</b>                                          | M01C; L04AA13; A07EC01; P01BA01; P01BA02                                        | M05; M06; M07.1; M07.2; M07.3; M08; M09                                                                                                                                                                         |
| <b>Stroke</b>                                                        | C05A                                                                            | I60 <sup>2</sup> ; I61 <sup>2</sup> ; I63-I64 <sup>2</sup>                                                                                                                                                      |

1. Minimum of two contacts/purchases; 2. A-diagnosis; 3. B-diagnosis

**Supplementary Table S2** Overview of variables obtained from national registers

| Information                    | Register                                  | Variable                 | Reference                                                                                                                                                                             |
|--------------------------------|-------------------------------------------|--------------------------|---------------------------------------------------------------------------------------------------------------------------------------------------------------------------------------|
| Personal identification number | All registers                             | PNR                      | See below                                                                                                                                                                             |
| Death                          | Danish Civil Registration System          | DODDATO                  | Pedersen, C. B. (2011). The Danish Civil Registration System. <i>Scand J Public Health.</i> , 39(7 Suppl), 22-25. doi: 10.1177/1403494810387965.                                      |
| Migration                      | Danish Civil Registration System          | HAEND_DATO<br>INDUD_KODE | Pedersen, C. B. (2011). The Danish Civil Registration System. <i>Scand J Public Health.</i> , 39(7 Suppl), 22-25. doi: 10.1177/1403494810387965.                                      |
| Income                         | Income Statistics Register                | DISPON_NY                | Baadsgaard, M., & Quitzau, J. (2011). Danish registers on personal income and transfer payments. <i>Scand J Public Health.</i> , 39(7 Suppl), 103-105. doi: 10.1177/1403494811405098. |
| Financial assets               |                                           | FORMREST_NY05            |                                                                                                                                                                                       |
| Household ownership            |                                           | KOEJD                    |                                                                                                                                                                                       |
| Morbidities                    | The Danish National Prescription Registry | ATC                      | Kildemoes, H. W., Sorensen, H. T., & Hallas, J. (2011). The Danish National Prescription Registry. <i>Scand J Public Health.</i> , 39(7 Suppl), 38-41. doi: 10.1177/1403494810394717. |
|                                | National Patient Registry                 | RECNUM                   | Lynge, E., Sandegaard, J. L., & Rebolj, M. (2011). The Danish National Patient Register. <i>Scand J Public Health.</i> , 39(7 Suppl), 30-33. doi: 10.1177/1403494811401482.           |
|                                |                                           | C_DIAG                   |                                                                                                                                                                                       |
|                                |                                           | C_DIAGTYPE               |                                                                                                                                                                                       |

**Supplementary Table S3** Description of selection of number of trajectory classes for mobility limitations

| BIC based on number of individuals  |          |           |        |       |
|-------------------------------------|----------|-----------|--------|-------|
| Number of groups                    | BIC      | Nul model | 2*ΔBIC | Form  |
| 2                                   | -9260.38 | 1         |        | 02    |
| 3                                   | -9014.41 | 2         | 491.94 | 022   |
| 4                                   | -8980.78 | 3         | 67.26  | 0222  |
| 5                                   | -8971.61 | 4         | 18.34  | 02222 |
| BIC based on number of observations |          |           |        |       |
| Number of groups                    | BIC      | Nul model | 2*ΔBIC | Form  |
| 2                                   | -9265.90 |           |        | 02    |
| 3                                   | -9021.98 | 2         | 487.84 | 022   |
| 4                                   | -8991.10 | 3         | 61.76  | 0222  |
| 5                                   | -8982.67 | 4         | 16.86  | 02222 |

\*\*We chose the model with four groups instead of five groups even though the BIC values indicate a slightly better model fit for the latter. This decision was based on observation that the “extra” trajectory in the five group model did not differ sufficiently from the first trajectory in the model; stay high with 0 limitations on the Mob-H scale. The extra trajectory was characterized by a stable mobility limitations of 0.5 limitations on the Mob-H scale.

**Supplementary Table S4** Deaths related to socio-demographic factors and social relations.

| Supplementary Table S4 Deaths related to socio-demographic factors and social relations. |                            |            |
|------------------------------------------------------------------------------------------|----------------------------|------------|
|                                                                                          | 5-year mortality cases (%) |            |
| Gender and mobility limitations trajectory                                               |                            |            |
|                                                                                          | Men                        | Women      |
| No mobility limitations                                                                  | 327 (33.3)                 | 243 (21.7) |
| No mobility limitations followed by increase in limitations                              | 35 (70.0)                  | 32 (45.1)  |
| Medium mobility limitation level followed by stable increase in limitations              | 114 (68.7)                 | 194 (40.6) |
| High mobility limitation level followed by increase in limitations                       | 34 (68.0)                  | 88 (62.4)  |
| Age and mobility limitations trajectory                                                  |                            |            |
|                                                                                          | 75 years                   | 80 years   |
| No mobility limitations                                                                  | 401 (24.3)                 | 169 (37.8) |
| No mobility limitations followed by increase in limitations                              | 37 (48.7)                  | 30 (66.7)  |
| Medium mobility limitation level followed by stable increase in limitations              | 168 (41.5)                 | 140 (58.6) |
| High mobility limitation level followed by increase in limitations                       | 64 (56.1)                  | 58 (75.3)  |
|                                                                                          | High                       | Low        |
| Financial asset and mobility limitations trajectory                                      |                            |            |
| No mobility limitations                                                                  | 472 (26.6)                 | 98 (30.2)  |
| No mobility limitations followed by increase in limitations                              | 59 (57.3)                  | 8 (44.4)   |
| Medium mobility limitation level followed by stable increase in limitations              | 240 (48.2)                 | 68 (46.6)  |
| High mobility limitation level followed by increase in limitations                       | 88 (65.7)                  | 34 (59.7)  |
| Cohabitation status and mobility limitations trajectory                                  |                            |            |
| No mobility limitations                                                                  | 342 (27.6)                 | 228 (26.6) |
| No mobility limitations followed by increase in limitations                              | 30 (55.6)                  | 37 (55.2)  |
| Medium mobility limitation level followed by stable increase in limitations              | 143 (46.9)                 | 165 (48.7) |
| High mobility limitation level followed by increase in limitations                       | 53 (62.4)                  | 69 (65.1)  |
| Visits and mobility limitations trajectory                                               |                            |            |
| No mobility limitations                                                                  | 497 (26.6)                 | 73 (31.9)  |
| No mobility limitations followed by increase in limitations                              | 55 (54.5)                  | 12 (60.0)  |
| Medium mobility limitation level followed by stable increase in limitations              | 241 (46.6)                 | 67 (52.8)  |
| High mobility limitation level followed by increase in limitations                       | 80 (65.6)                  | 42 (60.9)  |
| Social activity and mobility limitations trajectory                                      |                            |            |
| No mobility limitations                                                                  | 322 (25.3)                 | 248 (30.1) |
| No mobility limitations followed by increase in limitations                              | 37 (57.8)                  | 30 (52.6)  |
| Medium mobility limitation level followed by stable increase in limitations              | 145 (44.2)                 | 163 (51.6) |
| High mobility limitation level followed by increase in limitations                       | 40 (63.5)                  | 82 (64.1)  |

**Table S5** Hazard ratios (HR) and 95% confidence intervals associated with trajectories of mobility limitations stratified in 3055 older adults.

| <b>Mobility limitations trajectory</b>                                             | <b>HR (CI95%)</b> |
|------------------------------------------------------------------------------------|-------------------|
| No mobility limitations                                                            | 1.00              |
| No mobility limitations followed by increase in limitations                        | 2.32 (1.85;2.92)  |
| Medium mobility limitation level followed by stable increase in limitations        | 2.06 (1.82;2.34)  |
| High mobility limitation level followed by increase in limitations                 | 3.06 (2.59;3.62)  |
| Adjusted for age, gender, comorbidities, the measures of social relations and SEP. |                   |

**Supplementary Table S6** Hazard ratios (HR) and 95% confidence intervals associated with trajectories of mobility limitations stratified in stratified analyses

|                                                                             | HR (95%CI) for mortality |                   |
|-----------------------------------------------------------------------------|--------------------------|-------------------|
| Gender and mobility limitations trajectory                                  |                          |                   |
|                                                                             | Men                      | Women             |
| No mobility limitations                                                     | 1.00                     | 1.00              |
| No mobility limitations followed by increase in limitations                 | 2.69 (1.98;3.64)         | 1.98 (1.40;2.80)  |
| Medium mobility limitation level followed by stable increase in limitations | 2.47 (2.07;2.96)*        | 1.75 (1.47;2.10)* |
| High mobility limitation level followed by increase in limitations          | 2.82 (2.17;3.66)         | 2.96 (2.36;3.73)  |
| Age and mobility limitations trajectory                                     |                          |                   |
|                                                                             | 75 years                 | 80 years          |
| No mobility limitations                                                     | 1.00                     | 1.00              |
| No mobility limitations followed by increase in limitations                 | 2.26 (1.66;3.09)         | 2.43 (1.72;3.42)  |
| Medium mobility limitation level followed by stable increase in limitations | 2.13 (1.80;2.50)         | 1.97 (1.61;2.42)  |
| High mobility limitation level followed by increase in limitations          | 2.64 (2.10;3.32)*        | 3.57 (2.77;4.59)* |
|                                                                             | High                     | Low               |
| Financial asset and mobility limitations trajectory                         |                          |                   |
| No mobility limitations                                                     | 1.00                     | 1.00              |
| No mobility limitations followed by increase in limitations                 | 2.54 (1.99;3.25)         | 1.65 (0.86;3.16)  |
| Medium mobility limitation level followed by stable increase in limitations | 2.09 (1.81;2.41)         | 1.92 (1.46;2.52)  |
| High mobility limitation level followed by increase in limitations          | 3.44 (2.85;4.16)*        | 2.35 (1.65;3.34)* |
| Cohabitation status and mobility limitations trajectory                     |                          |                   |
| No mobility limitations                                                     | 1.00                     | 1.00              |
| No mobility limitations followed by increase in limitations                 | 2.50 (1.79;3.50)         | 2.25 (1.64;3.10)  |
| Medium mobility limitation level followed by stable increase in limitations | 2.07 (1.74;2.47)         | 2.06 (1.71;2.48)  |
| High mobility limitation level followed by increase in limitations          | 3.12 (2.46;3.96)         | 3.11 (2.44;3.96)  |
| Visits and mobility limitations trajectory                                  |                          |                   |
| No mobility limitations                                                     | 1.00                     | 1.00              |
| No mobility limitations followed by increase in limitations                 | 2.36 (1.83;3.05)         | 2.43 (1.41;4.20)  |
| Medium mobility limitation level followed by stable increase in limitations | 2.10 (1.83;2.42)         | 1.90 (1.41;2.56)  |
| High mobility limitation level followed by increase in limitations          | 3.28 (2.69;4.00)         | 2.72 (1.95;3.79)  |
| Social activity and mobility limitations trajectory                         |                          |                   |
| No mobility limitations                                                     | 1.00                     | 1.00              |
| No mobility limitations followed by increase in limitations                 | 2.66 (1.94;3.65)         | 2.01 (1.44;2.81)  |
| Medium mobility limitation level followed by stable increase in limitations | 2.18 (1.81;2.62)         | 1.97 (1.65;2.35)  |
| High mobility limitation level followed by increase in limitations          | 3.17 (2.37;4.23)         | 2.85 (2.31;3.51)  |

Adjusted for: age, gender, comorbidities, the measures of social relations and SEP  
\*P-value for interaction: <0.5,

**Supplementary Table S7** Descriptive analyses of those excluded due to missing data, numbers (%) among the 4040 who were alive 1st January 1999

|                            | <b>Included</b> | <b>Exclusion due to death</b> | <b>Excluded due to migration</b> | <b>Excluded due to missing on core variables</b> |
|----------------------------|-----------------|-------------------------------|----------------------------------|--------------------------------------------------|
| <b>All</b>                 | 3055            | 915                           | 4                                | 66                                               |
| <b>Gender</b>              |                 |                               |                                  |                                                  |
| Males                      | 1247 (40.8)     | 509 (55.6)                    | 1 (25.0)                         | 31 (47.0)                                        |
| Females                    | 1808 (59.2)     | 406 (44.4)                    | 3 (75.0)                         | 35 (53.0)                                        |
| <b>Age at baseline</b>     |                 |                               |                                  |                                                  |
| 75 years                   | 2247 (73.6)     | 567 (62.0)                    | 4 (100.0)                        | 45 (68.2)                                        |
| 80 years                   | 808 (26.5)      | 348 (38.0)                    | 0 (0.0)                          | 21 (31.8)                                        |
| <b>Cohabitation status</b> |                 |                               |                                  |                                                  |
| Cohabiting                 | 1685 (55.2)     | 530 (58.1)                    | 1 (25.0)                         | 32 (50.8)                                        |
| Living alone               | 1370 (44.8)     | 383 (41.9)                    | 3 (75.0)                         | 31 (49.2)                                        |
| missing                    | 0               | 2                             | 0                                | 3                                                |
| <b>Financial assets</b>    |                 |                               |                                  |                                                  |
| High                       | 2509 (82.1)     | 670 (73.2)                    | 2 (50.0)                         | 51 (77.3)                                        |
| Low                        | 546 (17.9)      | 245 (26.8)                    | 2 (50.0)                         | 15 (22.7)                                        |
| <b>Morbidities</b>         |                 |                               |                                  |                                                  |
| 0                          | 2151 (70.4)     | 456 (49.8)                    | 4 (100.0)                        | 45 (68.2)                                        |
| 1+                         | 904 (29.6)      | 459 (50.2)                    | 0 (0.0)                          | 21 (31.8)                                        |

**Supplementary Table S8** Additional deaths per 1000 person years (py) (CI95%) associated with trajectories of mobility limitations stratified and social relations measured in 2001-02.

|                                                                             | High                  | Low                   |
|-----------------------------------------------------------------------------|-----------------------|-----------------------|
| <b>Cohabitation status and mobility limitations trajectory</b>              | <b>N=2817</b>         |                       |
| No mobility limitations                                                     | 0.00 (reference)      | 0.00 (reference)      |
| No mobility limitations followed by increase in limitations                 | 90.40 (16.94;163.86)  | 77.11 (22.51;131.71)  |
| Medium mobility limitation level followed by stable increase in limitations | 53.24 (21.76;84.72)   | 60.83 (34.39;87.27)   |
| High mobility limitation level followed by increase in limitations          | 111.85 (41.33;182.37) | 148.51 (81.29;215.73) |
| <b>Visits and mobility limitations trajectory</b>                           | <b>N=2621</b>         |                       |
| No mobility limitations                                                     | 0.00 (reference)      | 0.00 (reference)      |
| No mobility limitations followed by increase in limitations                 | 66.27 (16.83;115.71)  | 43.32 (67.89;154.53)  |
| Medium mobility limitation level followed by stable increase in limitations | 52.17 (31.43;72.91)   | 41.92 (-8.25;92.09)   |
| High mobility limitation level followed by increase in limitations          | 85.99 (28.70;143.27)  | 128.53 (53.85;203.21) |
| <b>Social activity and mobility limitations trajectory</b>                  | <b>N=2616</b>         |                       |
| No mobility limitations                                                     | 0.00 (reference)      | 0.00 (reference)      |
| No mobility limitations followed by increase in limitations                 | 117.41 (23.33;211.49) | 60.76 (6.84;114.67)   |
| Medium mobility limitation level followed by stable increase in limitations | 52.09 (23.24;80.93)   | 52.62 (22.77;82.47)   |
| High mobility limitation level followed by increase in limitations          | 89.44 (12.87;166.00)  | 123.14 (66.06;180.22) |
